# Supplementary material for: Emergence of synchronization-induced patterns in two-dimensional magnetic rod systems under rotating magnetic fields
Source: Royal Society of Chemistry journal article supplement (doi:10.1039/d4sm01442a), 2024-12-17
Supplement: d4sm01442a7.pdf [file d4sm01442a7.pdf]

SUPPLEMENTAR MATERIAL FOR:  
Emergence of Synchronization-Induced Patterns in  
Two-dimensional Magnetic Rod Systems under Rotating Magnetic  
Fields

Jorge L. C. Domingos<sup>1</sup>, F. Q. Potiguar<sup>2</sup>, C. L. N. Oliveira<sup>1</sup>, and W. P. Ferreira<sup>1</sup>

<sup>1</sup>Departamento de Física, Universidade Federal do Ceará, Fortaleza, Ceará, Brazil

<sup>2</sup>Universidade Federal do Pará, Faculdade de Física, ICEN, Belém, Pará, Brazil

Email: [jorgecapuan@fisica.ufc.br](mailto:jorgecapuan@fisica.ufc.br)

## Supplementary movies

- Movie A1: Swarming of magnetic rods with an aspect ratio  $l = 2$  in the High Synchronization regime for  $B_0 = 50$  and  $\omega_0 = 5$ . The large blue rod represents the external magnetic field's rotation. This movie is sped up by a factor of 75.
- Movie A2: Magnetic rods with an aspect ratio  $l = 4$  in the High Synchronization regime for  $B_0 = 50$  and  $\omega_0 = 5$ . The large blue rod represents the external magnetic field's rotation. This movie is sped up by a factor of 17.
- Movie A3: Magnetic rods with an aspect ratio  $l = 2$  in the Intermediate Synchronization regime for  $B_0 = 30$  and  $\omega_0 = 30$ . The large blue rod represents the external magnetic field's rotation. This movie is sped up by a factor of 1.4.
- Movie A4: Magnetic rods with an aspect ratio  $l = 3$  in the Intermediate Synchronization regime for  $B_0 = 50$  and  $\omega_0 = 30$ . The large blue rod represents the external magnetic field's rotation.
- Movie A5: Magnetic rods with an aspect ratio  $l = 4$  in the Intermediate Synchronization regime for  $B_0 = 50$  and  $\omega_0 = 30$ . The large blue rod represents the external magnetic field's rotation. This movie is sped up by a factor of 7.
- Movie A6: Magnetic rods with an aspect ratio  $l = 3$  in the Low Synchronization regime for  $B_0 = 10$  and  $\omega_0 = 30$ . The large blue rod represents the external magnetic field's rotation. This movie is sped up by a factor of 25.
